# Supplementary material for: Pulmonary vascular pruning in smokers with bronchiectasis
Source: PubMed Central journal article supplement — ERJ Open Res. 2018 Nov 23;4(4):00044-2018. doi: 10.1183/23120541.00044-2018 (PMC6250564; doi:10.1183/23120541.00044-2018), 2018-11-23
Supplement: 00044-2018_tableE1.pdf [file 00044-2018_tableE1.pdf]

**Supplement to:**

**Pulmonary vascular pruning in smokers with bronchiectasis**

Alejandro A. Diaz<sup>1</sup> MD, MPH, Diego J. Maselli<sup>2</sup> MD, Farbod Rahaghi<sup>1</sup> MD PhD, Carolyn E. Come<sup>1</sup> MD, MPH, Andrew Yen<sup>3</sup> MD, Erick S. Maclean<sup>1</sup> BS, Carlos H. Martinez<sup>4</sup> MD, MPH, Tsuneo Yamashiro<sup>5</sup> MD, David A. Lynch<sup>6</sup> MB, Wei Wang<sup>7</sup> PhD, Gregory L. Kinney<sup>8</sup> PhD, George R. Washko<sup>1</sup> MD MS, Raúl San José Estépar<sup>9</sup> PhD.

1. Division of Pulmonary and Critical Care Medicine, Brigham and Women's Hospital, Harvard Medical School, Boston MA
2. Division of Pulmonary Diseases & Critical Care, University of Texas Health Science Center, San Antonio TX
3. Department of Radiology, University of California, San Diego, San Diego, CA
4. Division of Pulmonary & Critical Care Medicine, University of Michigan Health System, Ann Arbor MI
5. Department of Radiology, Graduate School of Medical Science, University of the Ryukyus, Nishihara, Okinawa, Japan.
6. Department of Radiology, National Jewish Health, Denver CO
7. Division of Sleep Medicine, Brigham and Women's Hospital, Harvard Medical School, Boston MA
8. Colorado School of Public Health, University of Colorado Denver, Aurora CO
9. Department of Radiology, Brigham and Women's Hospital, Harvard Medical School, Boston MA

**Table E1** Reading for bronchiectasis on 486 baseline CT scans

| Reading                             | Bronchiectasis Ascertainment on CT |     |           | Total |
|-------------------------------------|------------------------------------|-----|-----------|-------|
|                                     | Yes                                | No  | Equivocal |       |
| First Reading                       | 52                                 | 434 | 0         | 486   |
| Second Reading                      | 156                                | 319 | 7         | 486   |
| Agreement Readings 1 and 2 (yes/no) | 339                                | 147 | -         | 486   |
| Third reading                       | 122                                | 25  | 0         | 147   |
| Final Diagnosis of Bronchiectasis   | 155                                | 331 | 0         | 486   |
